# Supplementary material
Source: publisher site journal article supplement (https://www.dovepress.com/article/467870)
Supplement: Supplementary file 1 [file get_supplementary_file.php]

# Supplement

**Social media listening platforms**

Weblinks for the social media listening platforms used in this research are included below:

- Inspire: <https://www.inspire.com/>
- Brandwatch Consumer Research Platform: <https://www.brandwatch.com/>

## Supplementary Table 1. The online patient and caregiver survey.

| **Question** | **Possible responses** |
| --- | --- |
| **Patient survey** | |
| Informed consent: By clicking on ‘I agree’ below, you are confirming that you are willing to participate in this research under the provisions that have been described, and that you consent to the sponsor using your personal information. You have the right to withdraw from the research at any time and to withhold information as you see fit. | - I agree - I do not agree [screened out] |
| Gender: With which gender identity do you most identify? | - Male - Female - Non-binary/gender non-conforming - A gender identity not listed here (please tell us what if you feel comfortable) [OPEN] |
| Age: How old are you? | - Under 18 [screened out] - 18–19 [screened out if 6 people already provided this response] - 20–29 [screened out if 6 people already provided this response] - 30–39 [screened out if 6 people already provided this response] - 40–49 [screened out if 6 people already provided this response] - 50–59 [screened out if 6 people already provided this response] - 60–69 [screened out if 6 people already provided this response] - ≥70 [screened out if 6 people already provided this response] |
| Asthma diagnosis: Which of the following conditions, if any, have you or a close family member ever been diagnosed with? | Answers   - I have been diagnosed with this condition - A close family member has been diagnosed with this condition   Scale   - Asthma [one of these options must be chosen] - BOTH asthma and COPD [one of these options must be chosen] - COPD - Cystic fibrosis - Diabetes - Pneumonia - Pulmonary fibrosis - Tuberculosis - I/a close family member have/has never been diagnosed with any of these conditions [screened out] |
| Asthma comorbidities: As well as your asthma, what other medical conditions do you have? | [OPEN] |
| Asthma and COPD: Has a doctor or healthcare professional ever discussed the possibility of having asthma with you? | - Yes - No [screened out] |
| Symptoms experienced: Which of the following symptoms, if any, have you ever experienced? | - Wheezing - Coughing - Sputum (i.e., coughing up saliva and mucus) - Difficulty breathing - Tightness in your chest - Symptoms at night - None of these |
| Frequency of symptoms: And how often do you typically experience these symptoms? | - More than once a day - Once a day - A few times a week - Once a week - Once a fortnight - Once a month - Less than once a month |
| Asthma treatment format: Which, if any, of the following medications has your healthcare professional recommended you take regularly for your asthma? | - Tablets (oral corticosteroids) [screened out] - Tablets (non-steroid) - Inhaler once daily - Inhaler rescue (i.e., only when needed) - Inhaler multiple times a day - Injections (e.g., a biologic treatment) [screened out] - Nebuliser - Other (please specify) [OPEN] - I am not taking any medication for my asthma |
| Asthma treatment – ingredient brand: The team is really interested in understanding a bit more about what sort of medication you use. We’d really appreciate it if you could go and get your medication and tell us the name and main ingredients listed on it. | [OPEN] |
| Trelegy Ellipta: Which of the following inhalers do you currently use for your asthma? | - Trelegy Ellipta (fluticasone furoate/umeclidinium/vilanterol) - Qvar (beclomethasone dipropionate) - Alvesco (ciclesonide) - Flixotide (fluticasone propionate) - Pulmicort (budesonide) - Something please (please tell us what) [OPEN] |
| Rural/urban: Which of the following best describes the area where you have received treatment? | - An urban area (e.g., a city) - A suburban area (the outskirts of a city or a town) - A rural area - Prefer not to say |
| Ethnicity: Do you consider yourself to be Hispanic or Latino?* | - Yes - No - Prefer not to say |
| Race: Which of the following racial designations best describes you? | - White - Black/African American - American Indian or Alaskan Native - Asian - Native Hawaiian or Pacific Islander - I identify with a different ethnic background (please tell us how if you feel comfortable) [OPEN] - Prefer not to say |
| Feelings today: Please drag the slider below to tell us how well you have felt during the last 4 weeks in each of the following areas of your life. | Answers   - Your physical health - Your mental health - Your emotional wellbeing   Scale   - Not well at all - Not that well - A bit well - Quite well - Very well |
| First symptoms experienced: Please could you tell me which symptoms you first experienced that made you realise you might need to seek medical help? | [OPEN] |
| Time when first symptoms experienced: How long ago did you first experience these symptoms? | [OPEN] |
| Time period before seeking help: And how long did you experience these symptoms before looking for medical help, such as seeing a doctor? | [OPEN] |
| Diagnosis received: After looking for medical help, how long did it take you to get a diagnosis? | [OPEN] |
| Who diagnosed: And what type of healthcare professional made the official diagnosis? | - General practitioner/family doctor/primary care physician† - Practice nurse - Allergist - Pulmonologist - Someone else (please tell us what type of healthcare professional) [OPEN] - I’m not sure |
| Diagnosis location: Which of the following best describes where you were diagnosed? | - In my doctor’s practice/local surgery - In a hospital - Somewhere else (please tell us where) [OPEN] |
| Emotions on diagnosis: My final question for now is how did you feel when you received the diagnosis of asthma? | [OPEN] |
| Impact of asthma on life: Continuing to think about these areas of your life, which might have been affected by asthma… | 1. Which area of life your asthma has had the greatest impact on (e.g., relationships, hobbies, work, finance, etc) and explain how. [OPEN] 2. A time when asthma held you back from doing something you were able to do before your diagnosis. [OPEN] 3. If you could make a wish to do one thing despite your asthma, what would that be? [OPEN] 4. If you didn’t have asthma, would your life be different now? [OPEN] |
| Most difficult symptoms: In the 3 boxes below, please tell us up to 3 symptoms of your asthma that have the biggest impact in stopping you being able to do something you want to? | [OPEN – THREE RESPONSE BOXES PROVIDED] |
| Reason for most difficult symptoms to manage: Please tell us for each of these symptoms, why does this symptom have the biggest impact in stopping you from doing something and how do these symptoms make you feel? | [OPEN] |
| Treatment methods tried – spontaneous: Please tell us about how you have tried treating or managing your symptoms of asthma, including which symptoms you use each treatment/management approach for and whether this has changed over time. | [OPEN] |
| Treatment methods tried – prompted: Which of the following, if any, have you ever tried to help treat or manage your asthma? | - Medication prescribed by a healthcare professional - Exercise - Rest - Relaxation techniques (e.g., meditation) - Seeing a physio - Pulmonary rehabilitation (e.g., a physical exercise programme designed for people with lung conditions) - Alternative medicine - None of these |
| Greatest challenge with treatment: In your experience, what is the biggest difficulty or challenge you have when it comes to treatment for your asthma/managing your asthma? | [OPEN] |
| The right treatment: Have you had a treatment for your asthma that didn’t feel right? Please explain why this did not feel right and what did you do? | [OPEN] |
| Getting the right treatment: How long did it take your asthma to get the right treatment (if at all)? Please explain what steps you took, any frustrations, successes, and if you feel you are now on the right treatment or think you need to go further? | [OPEN] |
| Changes in treatment: Have you ever changed or switched treatments for your asthma? | - I have changed treatments before for my asthma - I have never changed treatments before - I’m not sure |
| Guidance to friend – treatment (Trelegy user): You have a friend who is about to be switched treatments to Trelegy Ellipta. Provide some guidance and tips on the experience and what to look out for.  OR  Guidance to friend – treatment (Trelegy non-user): You have a friend who is about to switch treatments onto the same switch as you. Provide some guidance and tips on the experience and what to look out for. | 1. Describe to them why you changed and what they should expect. [OPEN] 2. Describe your experiences on the new treatment and how it made you feel. [OPEN] 3. Whether it was your doctor suggesting the change or you, and the discussions that were had at the time. [OPEN] 4. The questions and discussions they should be having with their doctor as they progress with the treatment. [OPEN] |
| Healthcare professionals seen: Please could you tell me which of the healthcare provider(s) you typically see as part of your asthma care? | - General practitioner/family doctor/primary care physician - Practice nurse - Allergist - Respiratory specialist (e.g., pulmonologist) - Someone else (please tell us what type of healthcare professional) [OPEN] - I’m not sure |
| How often patients see each healthcare professional: And how regularly do you typically see these healthcare professionals? | [OPEN] |
| What happens at appointment: Please describe what a typical appointment looks like, including whether any tests are usually done and the questions you ask. You might also like to think about the number of visits, length of time in the appointment, and how often they are. | [OPEN] |
| How do you feel at appointment: And during that appointment, the answers you were given and how comfortable you are asking questions or raising concerns you may have. Why do you feel this way? | [OPEN] |
| Email – ideal treatment and hopes/concerns for the future: Imagine you are emailing a company who is working on developing techniques, treatments, and support to help people with their asthma. They want to hear from you to understand these things. | 1. Any hopes or concerns that you have for your asthma for the future. [OPEN] 2. What the ideal treatment (other than a cure) to help manage your asthma would be. [OPEN] 3. How you would like to receive information about asthma treatment. [OPEN] 4. How you feel about the quality of information about asthma currently available. [OPEN] |
| **Caregiver survey** | |
| Informed consent: By clicking on ‘I agree’ below, you are confirming that you are willing to participate in this research under the provisions that have been described, and that you consent to the sponsor using your personal information. You have the right to withdraw from the research at any time and to withhold information as you see fit. | - I agree - I do not agree [screened out] |
| Gender: With which gender identity do you most identify? | - Male - Female - Non-binary/gender non-conforming - A gender identity not listed here (please tell us what if you feel comfortable) [OPEN] |
| Age: How old are you? | - Under 18 [screened out] - 18–19 [screened out if 6 people already provided this response] - 20–29 [screened out if 6 people already provided this response] - 30–39 [screened out if 6 people already provided this response] - 40–49 [screened out if 6 people already provided this response] - 50–59 [screened out if 6 people already provided this response] - 60–69 [screened out if 6 people already provided this response] - ≥70 [screened out if 6 people already provided this response] |
| Asthma diagnosis: Which of the following conditions, if any, have you or a close family member ever been diagnosed with? | Answers   - I have been diagnosed with this condition - A close family member has been diagnosed with this condition   Scale   - Asthma [one of these options must be chosen] - BOTH asthma and COPD [one of these options must be chosen] - COPD - Cystic fibrosis - Diabetes - Pneumonia - Pulmonary fibrosis - Tuberculosis - I/a close family member have never been diagnosed with any of these conditions [screened out] |
| Asthma comorbidities: As well as your asthma, what other medical conditions does your relative have? | [OPEN] |
| Asthma and COPD: Has a doctor or healthcare professional ever discussed the possibility of your relative having asthma with you or them? | - Yes - No [screened out] |
| Symptoms experienced: Which of the following symptoms, if any, have they ever experienced? | - Wheezing - Coughing - Sputum (i.e., coughing up saliva and mucus) - Difficulty breathing - Tightness in your chest - Symptoms at night - None of these |
| Frequency of symptoms: And how often do they typically experience these symptoms? | - More than once a day - Once a day - A few times a week - Once a week - Once a fortnight - Once a month - Less than once a month |
| Asthma treatment format: Which, if any, of the following medications are they taking for their asthma? | - Tablets (e.g., leukotriene receptor antagonist, oral corticosteroids) - Inhalers - Injections (e.g., a biologic treatment) - Nebuliser - Other (please specify) [OPEN] - They are not taking any medication for their asthma |
| Asthma treatment – ingredient brand: The team is really interested in understanding a bit more about what sort of medication your relative uses. We’d really appreciate it if you could go and get their medication and tell us the name and main ingredients listed on it. | [OPEN] |
| Trelegy Ellipta: Which of the following inhalers does your close relative currently use for their asthma? | - Trelegy Ellipta (fluticasone furoate/umeclidinium/vilanterol) - Qvar (beclomethasone dipropionate) - Alvesco (ciclesonide) - Flixotide (fluticasone propionate) - Pulmicort (budesonide) - Something else (please tell us what) [OPEN] |
| Family member – role in care: Which of the following statements best describes how involved you are in their care or decisions about their care when it comes to their asthma? | - I am not at all involved with their care or decisions about their care - I am not that involved in their care or decisions about their care - I am somewhat involved in their care or decisions about their care - I am very involved in their care or decisions about their care [one of these options must be chosen] - I am completely involved in their care or decisions about their care [one of these options must be chosen] |
| Relationship to asthma patient: Which of the following statements best describes what relation this family member is to you? | - Spouse/partner - Parent - Grandparent - Great grandparent - Sibling (for example, a brother/sister) - Aunt/uncle - Cousin - Other (please tell us what) [OPEN] |
| Rural/urban: Which of the following best describes the area where your relative received treatment? | - An urban area (e.g., a city) - A suburban area (the outskirts of a city or a town) - A rural area - Prefer not to say |
| Ethnicity: Does your relative consider themself to be Hispanic or Latino?* | - Yes - No - Prefer not to say |
| Race: Which of the following racial designations best describes your relative’s race? | - White - Black/African American - American Indian or Alaskan Native - Asian - Native Hawaiian or Pacific Islander - They identify with a different ethnic background (please tell us how if you feel comfortable) [OPEN] - Prefer not to say |
| Feelings today: Please drag the slider below to tell us how well your relative has felt during the last 4 weeks in each of the following areas of their life. | Answers   - Their physical health - Their mental health - Their emotional wellbeing   Scale   - Not well at all - Not that well - A bit well - Quite well - Very well |
| First symptoms experienced: Please could you tell me which symptoms your close relative first experienced that made you realise they might need to seek medical help? | [OPEN] |
| Time when first symptoms experienced: How long ago did your close relative first experience these symptoms? | [OPEN] |
| Time period before seeking help: And how long did your close relative experience these symptoms before looking for medical help, such as seeing a doctor? | [OPEN] |
| Diagnosis received: After looking for medical help, how long did it take your close relative to get a diagnosis? | [OPEN] |
| Who diagnosed: And what type of healthcare professional made the official diagnosis? | - General practitioner/family doctor/primary care physician† - Practice nurse - Allergist - Pulmonologist - Someone else (please tell us what type of healthcare professional) [OPEN] - I’m not sure |
| Diagnosis location: Which of the following best describes where your relative was diagnosed? | - In their doctor’s practice/local surgery - In a hospital - Somewhere else (please tell us where) [OPEN] |
| Emotions on diagnosis: My final question for now is how did you and your close relative feel when they received the diagnosis of asthma? | [OPEN] |
| Impact of asthma on life: Continuing to think about these areas of your life, which might have been affected by asthma… | 1. Which area of life their asthma has had the greatest impact on (e.g., relationships, hobbies, work, finance, etc.) and explain how. [OPEN] 2. A time when asthma held them back from doing something they were able to do before their diagnosis. [OPEN] 3. If they could make a wish to do one thing despite their asthma, what would that be (as far as you think you can answer this)? [OPEN] 4. If they didn’t have asthma, what would be different in their and your lives now? [OPEN] |
| Most difficult symptoms: In the 3 boxes below, please tell us up to 3 symptoms of your relative’s asthma that have the biggest impact in stopping them being able to do something they want to? | [OPEN – THREE RESPONSE BOXES PROVIDED] |
| Reason for most difficult symptoms to manage: Please tell us for each of these symptoms, why does this symptom have the biggest impact in stopping your relative from doing something and how do these symptoms make your relative feel? | [OPEN] |
| Treatment methods tried – spontaneous: Please tell us about how they have tried treating or managing their symptoms of asthma, including which symptoms they use each treatment/management approach for and whether this has changed over time. | [OPEN] |
| Treatment methods tried – prompted: Which of the following, if any, have they ever tried to help treat or manage their asthma? | - Medication prescribed by a healthcare professional - Exercise - Rest - Relaxation techniques (e.g., meditation) - Seeing a physio - Pulmonary rehabilitation (e.g., a physical exercise programme designed for people with lung conditions) - Alternative medicine - None of these |
| Greatest challenge with treatment: In your experience, what is the biggest difficulty or challenge you have when it comes to treatment for their asthma/managing their asthma? | [OPEN] |
| The right treatment: Have they had a treatment for their asthma that didn’t feel right? Please explain why this did not feel right and what did you do? | [OPEN] |
| Getting the right treatment: How long did it take their asthma to get the right treatment (if at all)? Please explain what steps you took, any frustrations, successes, and if you feel they are now on the right treatment or think you need to go further? | [OPEN] |
| Changes in treatment: Has your relative ever changed or switched treatments for their asthma? | - My relative has changed treatments before for their asthma - My relative has never changed treatments before - I’m not sure |
| Guidance to friend – treatment (Trelegy user): You have a friend who is about to be switched treatments to Trelegy Ellipta. Provide some guidance and tips on the experience and what to look out for.  OR  Guidance to friend – treatment (Trelegy non-user): You have a friend who is about to switch treatments onto the same switch as your relative. Provide some guidance and tips on the experience and what to look out for. | 1. Describe to them why your relative changed and what they should expect. [OPEN] 2. Describe your relative’s experiences on the new treatment and how it made them feel. [OPEN] 3. Whether it was your doctor suggesting the change or you/your relative, and the discussions that were had at the time. [OPEN] 4. The questions and discussions they should be having with their doctor as they progress with the treatment. [OPEN] |
| Healthcare professionals seen: Please could you tell me which of the healthcare provider(s) your close relative typically sees as part of their asthma care? | - General practitioner/family doctor/primary care physician - Practice nurse - Allergist - Respiratory specialist (e.g., pulmonologist) - Someone else (please tell us what type of healthcare professional) [OPEN] - I’m not sure |
| How often patients see each healthcare professional: And how regularly does your close relative typically see these healthcare professionals? | [OPEN] |
| What happens at appointment: Please describe what a typical appointment looks like, including whether any tests are usually done and the questions you ask. You might also like to think about the number of visits, length of time in the appointment, and how often they are. | [OPEN] |
| How do you feel at appointment: And during that appointment, the answers you were given and how comfortable you are asking questions or raising concerns you may have. Why do you feel this way? | [OPEN] |
| Email – ideal treatment and hopes/concerns for the future: Imagine you are emailing a company who is working on developing techniques, treatments, and support to help people with their asthma. They want to hear from you to understand these things. | 1. Any hopes or concerns that you have for your close relative’s asthma for the future. [OPEN] 2. What the ideal treatment (other than a cure) to help manage your close relative’s asthma would be. [OPEN] 3. How your close relative would like to receive information about asthma treatment. [OPEN] 4. How your close relative feels about the quality of information about asthma currently available. [OPEN] |

Note: The outcomes of providing some responses are described in square brackets following the relevant response option. Questions and response options with open-ended text boxes for responses are marked as [OPEN].

*If the respondent is in Brazil or the US; †General practitioners or family doctors in Brazil, China, or Japan, or primary care physicians in the US.

COPD, chronic obstructive pulmonary disease; US, United States.
